# Supplementary figures and images for: Combined Toxic Effects of Heavy Metals and Antibiotics on a Pseudomonas fluorescens Strain ZY2 Isolated from Swine Wastewater
Source: MDPI journal article supplement (doi:10.3390/ijms16022839), 2015-01-27

# Supplementary Information

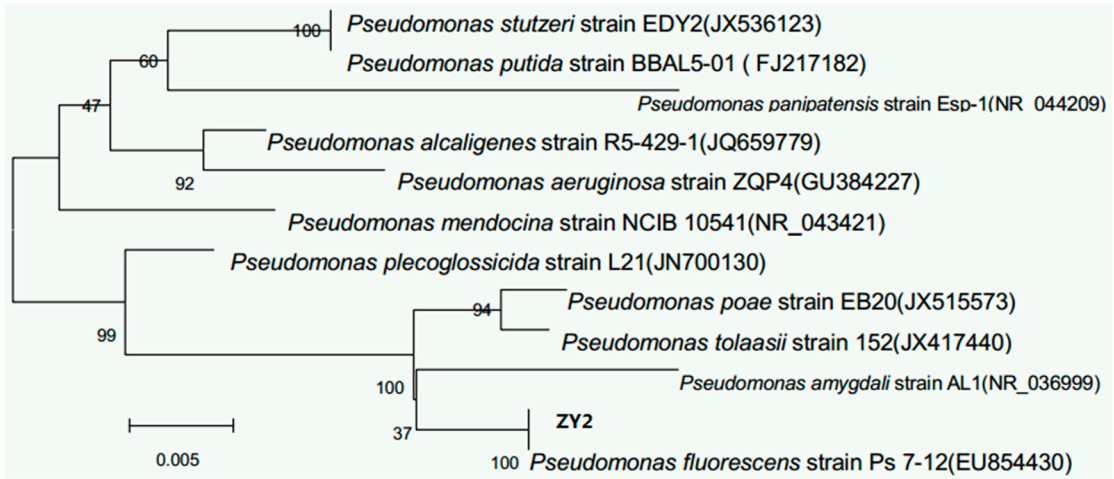

**Figure S1.** The phylogenetic tree of the strain named ZY2.

Supplement: s1 [file s1]
